# Supplementary material for: Adverse Pregnancy Outcomes in Solid Organ Transplant Recipients: A Systematic Review and Meta-Analysis
Source: PubMed Central journal article supplement (PMC11362861; doi:10.1001/jamanetworkopen.2024.30913), 2024-08-29
Supplement: jamanetwopen-e2430913-s001.pdf [file jamanetwopen-e2430913-s001.pdf]

## Supplemental Online Content

Yo JH, Fields N, Li W, et al. Adverse pregnancy outcomes in solid organ transplant recipients: a systematic review and meta-analysis. *JAMA Netw Open*. 2024;7(8):e2430913. doi:10.1001/jamanetworkopen.2024.30913

**eAppendix 1.** Search Strategy

**eTable 1.** Summary of Baseline Characteristics for Studies Reporting at Least 1 Adverse Pregnancy Outcome

**eTable 2.** Study Characteristics of Studies Reporting Allograft Outcomes During Pregnancy

**eFigure 1.** Forest Plot for Live Birth

**eFigure 2.** Forest Plot for Preterm Birth <32 Weeks (Adjusted Estimate)

**eFigure 3.** Forest Plot for Low Birth Weight <1500 g (Crude Estimate)

**eFigure 4.** Forest Plot for Caesarean Section (Adjusted Estimate)

**eFigure 5.** Forest Plot for Mean Difference in Gestational Age (Weeks)

**eTable 3.** Meta-Analysis of Allograft Outcomes During Pregnancy

**eFigure 6.** Forest Plot for Allograft Rejection During Pregnancy

**eFigure 7.** Forest Plot for Allograft Loss During Pregnancy

**eFigure 8.** Funnel Plot for Studies Reporting Allograft Rejection During Pregnancy

**eTable 4.** Risk of Bias Assessment for Studies Reporting at Least 1 Adverse Pregnancy Outcome

**eTable 5.** Risk of Bias Assessment for Allograft Outcomes

This supplemental material has been provided by the authors to give readers additional information about their work.

## eAppendix 1. Search Strategy

A systematic literature search for studies was conducted on 2 August 2021 in MEDLINE and EMBASE on Ovid and in the Scopus database. All searches were re-run on 14 November 2023 to update the result set. The initial search strategy was tested and optimised in Ovid MEDLINE before translation to additional databases. The results were limited to suitable study designs and articles in English from 2000 onwards. In addition to searching citation databases, reference checking and citation searching was conducted on six studies selected for their relevance. Two authors manually searched five key journals across transplant medicine and nephrology.

The hand searched journals were American Journal of Transplantation, Clinical journal of American society of nephrology, Transplantation, Clinical transplantation and Kidney international as well as selected citations.

### EMBASE

1. transplantation/ or graft recipient/ or Organ transplantation/ or Heart transplantation/ or Kidney transplantation/ or Liver transplantation/ or Lung transplantation/ or Pancreas transplantation/
2. solid organ transplant\*.tw.
3. (solid organ adj3 (transplant\* or allograft\* or graft\* or allotransplantation)).tw.
4. (transplant\* adj (organ or heart\* or cardiac or kidney\* or renal or liver\* or lung or pancre\*)).tw.
5. ((allograft\* or graft\* or allotransplantation) and (organ or heart\* or cardiac or kidney\* or renal or liver\* or lung or pancre\*)).mp.
6. 1 or 2 or 3 or 4 or 5
7. exp pregnancy complication/ or Pregnancy outcome/ or Birth Weight/ or high risk pregnancy/ or Stillbirth/ or spontaneous abortion/ or imminent abortion/ or preeclampsia/ or premature labor/
8. (pregnan\* adj3 (adverse or complication\* or high risk or outcome\*)).tw.
9. ((pregnan\* or obstetric\* or maternal) adj5 (toxemia\* or hyper?tension or gestosis or edema or pre?eclampsia or pre?eclamtic or eclamsia or pet or uterine complication\* or placental abruption or diabetes or mellitus)).tw.
10. ((birth or child?birth or delivery or labour or labor or parturition) adj5 (adverse or complication\* or preterm or prematur\* or prem or c?section or caesarean)).tw.
11. ((infant or newborn or neonat\* or perinatal or post?neonatal or postpartum) adj5 (mortalit\* or death or birth weight or low weight)).tw.
12. (live birth rate or still?birth or still?born or spontaneous abortion or miscarriage).tw.
13. (gestational complication\* or gestational age).tw.
14. (pregnan\* and (allograft loss or (reject\* adj2 (allograft or graft or transplant\*))))).tw.
15. exp Pregnancy/ and (Graft Rejection/ or Graft Survival/)
16. 7 or 8 or 9 or 10 or 11 or 12 or 13 or 14 or 15
17. 6 and 16
18. limit 17 to (yr="2000 -Current" and english)
19. exp case control study/ or exp cohort analysis/ or exp cross-sectional study/
20. ((cohort or case?control or follow up or observational) adj (studies or study or analy\*)).mp.
21. 19 or 20
22. 18 and 21

## Medline

1. Transplants/ or Transplant Recipients/ or Organ transplantation/ or Heart transplantation/ or Kidney transplantation/ or Liver transplantation/ or Lung transplantation/ or Pancreas transplantation/
2. solid organ transplant\*.tw.
3. (solid organ adj3 (transplant\* or allograft\* or graft\* or allotransplantation)).tw.
4. (transplant\* adj (organ or heart\* or cardiac or kidney\* or renal or liver\* or lung or pancre\*)).tw.
5. ((allograft\* or graft\* or allotransplantation) and (organ or heart\* or cardiac or kidney\* or renal or liver\* or lung or pancre\*)).mp.
6. 1 or 2 or 3 or 4 or 5
7. Pregnancy/ or exp Pregnancy complications/ or Pregnancy outcome/ or Birth Weight/ or Pregnancy, High-Risk/ or Stillbirth/ or Abortion, spontaneous/ or Abortion, threatened/ or Pre-eclampsia/ or exp Obstetric labor, premature/
8. (pregnan\* adj3 (adverse or complication\* or high risk or outcome\*)).tw.
9. ((pregnan\* or obstetric\* or maternal) adj5 (toxemia\* or hyper?tension or gestosis or edema or pre?eclampsia or pre?eclamtic or eclamsia or pet or uterine complication\* or placental abruption or diabetes or mellitus)).tw.
10. ((birth or child?birth or delivery or labour or labor or parturition) adj5 (adverse or complication\* or preterm or prematur\* or prem or c?section or caesarean)).tw.
11. ((infant or newborn or neonat\* or perinatal or post?neonatal or postpartum) adj5 (mortalit\* or death or birth weight or low weight)).tw.
12. (live birth rate or still?birth or still?born or spontaneous abortion or miscarriage).tw.
13. (gestational complication\* or gestational age).tw.
14. (pregnan\* and (allograft loss or (reject\* adj2 (allograft or graft or transplant\*))))).tw.
15. exp Pregnancy/ and (Graft Rejection/ or Graft Survival/)
16. 7 or 8 or 9 or 10 or 11 or 12 or 13 or 14 or 15
17. 6 and 16
18. limit 17 to (yr="2000 -Current" and english)
19. exp case-control studies/ or exp cohort studies/ or controlled before-after studies/ or cross-sectional studies/ or historically controlled study/ or Epidemiologic Studies/
20. ((cohort or case?control or follow up or observational) adj (studies or study or analy\*)).mp.
21. 19 or 20
22. 18 and 21

**eTable 1. Summary of baseline characteristics for studies reporting at least one adverse pregnancy outcome**

| Reference                            | With transplant |                  |                                    |                       |         |                     |                          | Without transplant |               |                       |                     |                          |
|--------------------------------------|-----------------|------------------|------------------------------------|-----------------------|---------|---------------------|--------------------------|--------------------|---------------|-----------------------|---------------------|--------------------------|
|                                      | N               | Mean age (yr)    | Interval transplant pregnancy (yr) | Baseline SCr (μmol/L) | CNI (%) | Preexisting HTN (%) | Preexisting diabetes (%) | N                  | Mean age (yr) | Baseline SCr (μmol/L) | Preexisting HTN (%) | Preexisting diabetes (%) |
| Craig et al, <sup>36</sup> 2023      | 199             | 27.6             | -                                  | -                     | -       | 17.9                | 14.2                     | 39 838 993         | 28.4          | -                     | 2.0                 | 1.1                      |
| Barros et al, <sup>16</sup> 2022     | 43              | 30.6             | 4.6                                | 114.1                 | 65.0    | 58.1                | 5.4                      | 200                | 32.5          | -                     | 1.0                 | 0.5                      |
| DeFilippis et al, <sup>17</sup> 2022 | 94              | 26.1             | -                                  | -                     | -       | 32.0                | 11.0                     | 21 922 537         | 28.1          | -                     | 0.1                 | 1.0                      |
| Hewawasam et al, <sup>18</sup> 2022  | 202             | 32.4             | 6                                  | 103                   | -       | 22.8                | 4.5                      | 2 902 933          | 29.0          | -                     | 0.9                 | 0.5                      |
| Mazanowska et al, <sup>19</sup> 2022 | 27              | 35.0             | 8.9                                | 91.1                  | 96.3    | 77.8                | -                        | 110                | 34.1          | -                     | 0.0                 | 0.0                      |
| Sobotka et al, <sup>20</sup> 2021    | 1469            | 27.2             | -                                  | -                     | -       | -                   | -                        | 38 447 561         | 28.0          | -                     | -                   | -                        |
| Piccoli et al, <sup>21</sup> 2017    | 121             | 34.1             | 5.2                                | 94.6                  | 92.5    | 55.0                | -                        | 1 418              | 31.2          | -                     | 0.0                 | 0.0                      |
| Madej et al, <sup>22</sup> 2016      | 101             | KT 29.6, LT 28.6 | KT 4.5, LT 6.9                     | -                     | 46.6    | KT 71.0, LT 16.0    | -                        | 187                | 29.6          | -                     | -                   | -                        |
| Majak et al, <sup>23</sup> 2016      | 119             | 30.3             | -                                  | -                     | -       | 31.9                | 5.0                      | 238                | 25.9          | -                     | 0.0                 | 0                        |
| Arab et al, <sup>24</sup> 2015       | 375             | -                | -                                  | -                     | -       | 32.0                | 10.1                     | 7 094 025          | -             | -                     | 1.3                 | 1.0                      |
| Wyld et al, <sup>25</sup> 2013       | 692             | 31               | 5.3                                | 106                   | 89.0    | -                   | -                        | 5 269 645          | 30            | -                     | -                   | -                        |
| Bramham et al, <sup>26</sup> 2013    | 105             | 32               | 5                                  | 118                   | 91.6    | -                   | -                        | 1 360              | -             | -                     | -                   | -                        |

| Reference                          | With transplant |               |                                    |                                    |         |                     |                          | Without transplant |               |                                    |                     |                          |
|------------------------------------|-----------------|---------------|------------------------------------|------------------------------------|---------|---------------------|--------------------------|--------------------|---------------|------------------------------------|---------------------|--------------------------|
|                                    | N               | Mean age (yr) | Interval transplant pregnancy (yr) | Baseline SCr ( $\mu\text{mol/L}$ ) | CNI (%) | Preexisting HTN (%) | Preexisting diabetes (%) | N                  | Mean age (yr) | Baseline SCr ( $\mu\text{mol/L}$ ) | Preexisting HTN (%) | Preexisting diabetes (%) |
| Coffin et al, <sup>27</sup> 2010   | 206             | 24            | -                                  | -                                  | -       | 2.9                 | 1.5                      | 4 060              | 25            | -                                  | 0.0                 | 0.0                      |
| Pezeshki et al, <sup>28</sup> 2004 | 20              | 29.2          | 3.0                                | -                                  | 100     | -                   | -                        | 100                | 28.0          | -                                  | -                   | -                        |

Abbreviations: N, total number of pregnancies; SCr, Serum Creatinine; CNI, Calcineurin inhibitor; HTN, Hypertension; KT, Kidney transplant; LT, Liver transplant

**eTable 2. Study characteristics of studies reporting allograft outcomes during pregnancy**

| <b>Author, year published</b>        | <b>Country</b> | <b>Period</b> | <b>Study design</b>  | <b>Pregnancies, n</b> |
|--------------------------------------|----------------|---------------|----------------------|-----------------------|
| Yin et al, <sup>15</sup> 2023        | United States  | 2000-2019     | Retrospective cohort | 638                   |
| Barros et al, <sup>16</sup> 2022     | Portugal       | 1991-2019     | Retrospective cohort | 43                    |
| Gosselink et al, <sup>29</sup> 2022  | Netherlands    | 1971-2017     | Retrospective cohort | 288                   |
| Mazanowska et al, <sup>19</sup> 2022 | Poland         | 2009-2020     | Retrospective cohort | 27                    |
| Scharwz et al, <sup>30</sup> 2022    | Germany        | 1972-2019     | Retrospective cohort | 92                    |
| Yuksel et al, <sup>31</sup> 2017     | Turkey         | 2009-2016     | Retrospective cohort | 25                    |
| Stoumpos et al, <sup>32</sup> 2016   | United Kingdom | 1970-2014     | Retrospective cohort | 138                   |
| Blume et al, <sup>33</sup> 2013      | Germany        | 1988-2010     | Retrospective cohort | 115                   |
| Bramham et al, <sup>26</sup> 2013    | United Kingdom | 2007-2009     | Retrospective cohort | 105                   |
| Coffin et al, <sup>27</sup> 2010     | United States  | 1993-2005     | Retrospective cohort | 206                   |
| Kim et al, <sup>34</sup> 2008        | South Korea    | 1991-2005     | Retrospective cohort | 74                    |
| Sibanda et al, <sup>35</sup> 2007    | United Kingdom | 1994-2001     | Retrospective cohort | 229                   |
| Pezeshki et al, <sup>28</sup> 2004   | Iran           | 1991-1998     | Retrospective cohort | 20                    |

**eFigure 1. Pooled crude odds ratio for the association between solid organ transplantation and live birth**

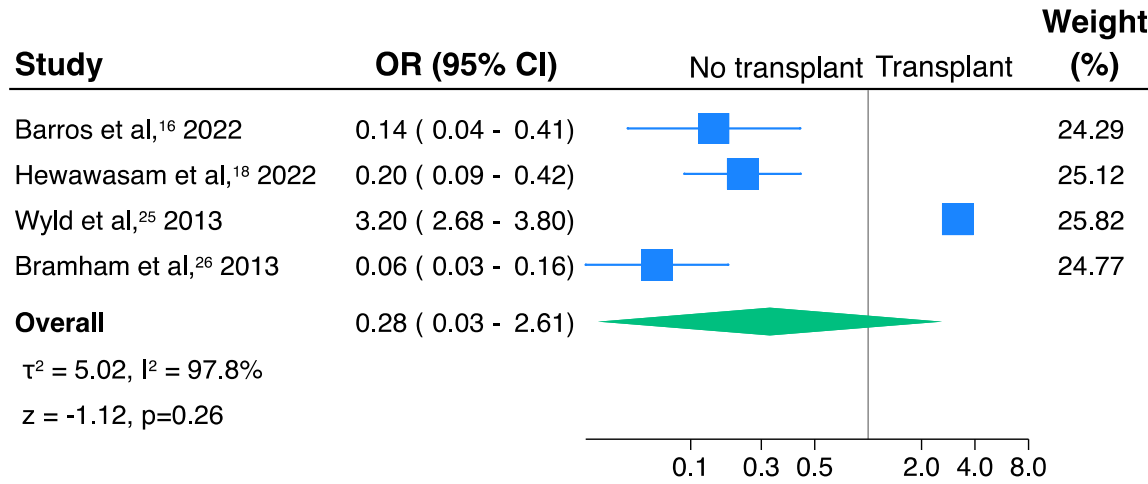

**eFigure 2. Pooled adjusted odds ratio for the association between solid organ transplantation and preterm birth < 32 weeks**

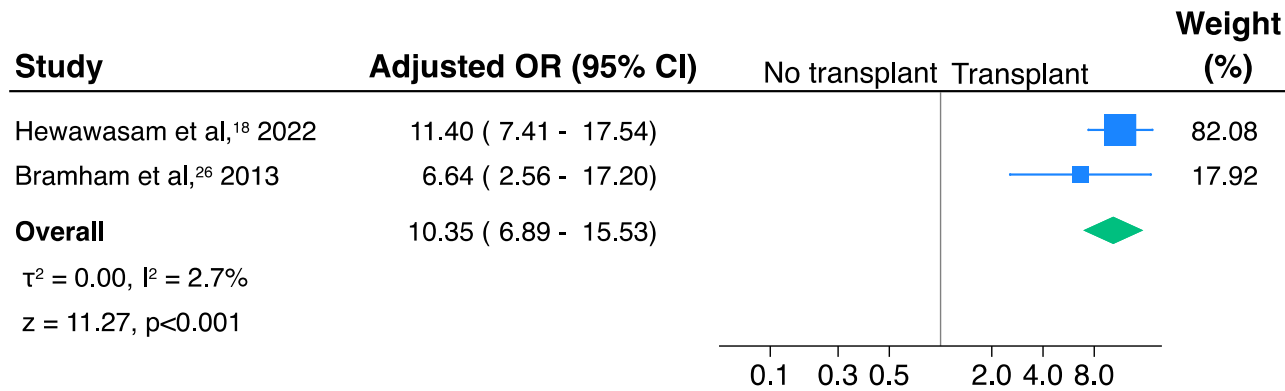



**eFigure 3. Pooled crude odds ratio for the association between solid organ transplantation and low birth weight <1500g**

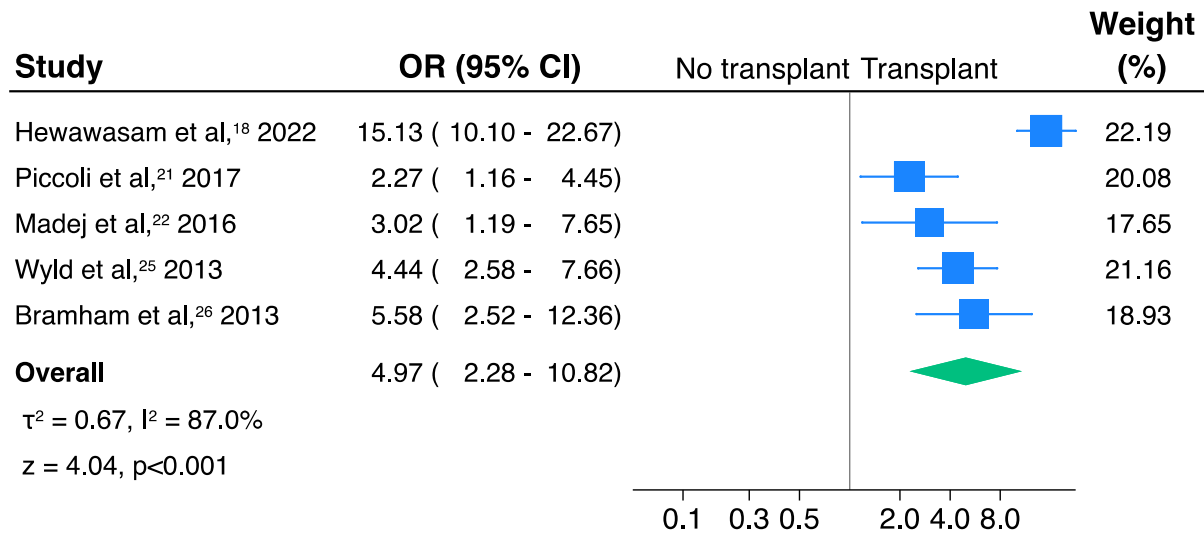

**eFigure 4. Pooled adjusted odds ratio for the association between solid organ transplantation and caesarean section**

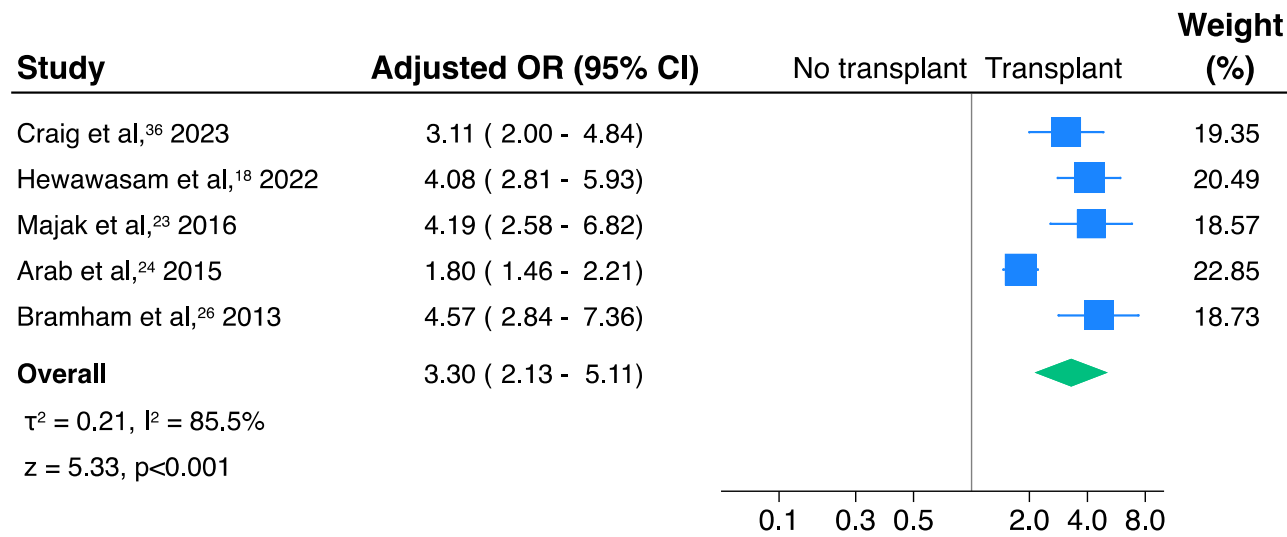

**eFigure 5. Pooled mean difference in gestational age**

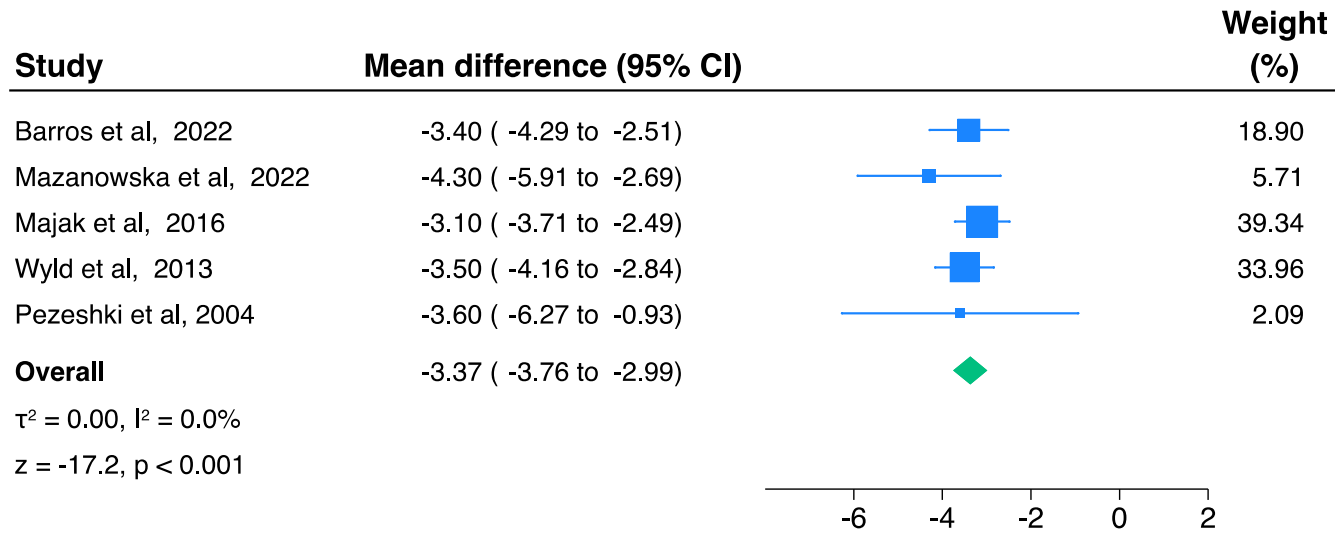

Gestational age was measured in weeks

**eTable 3. Meta-analysis of allograft outcomes during pregnancy**

| <b>Allograft outcomes</b>         | <b>No. of studies</b> | <b>Studies</b>                                                                                                                                                                                                                                                                                                                                                                                                                                                                          | <b>No. of pregnancies</b> | <b>No. of outcomes</b> | <b>Pooled incidence %, (95% CI)</b> | <b>I<sup>2</sup>, %</b> | <b>τ<sup>2</sup></b> |
|-----------------------------------|-----------------------|-----------------------------------------------------------------------------------------------------------------------------------------------------------------------------------------------------------------------------------------------------------------------------------------------------------------------------------------------------------------------------------------------------------------------------------------------------------------------------------------|---------------------------|------------------------|-------------------------------------|-------------------------|----------------------|
| Acute rejection during pregnancy  | 13                    | Yin et al, <sup>15</sup> 2023<br>Barros et al, <sup>16</sup> 2022<br>Gosselink et al, <sup>29</sup> 2022<br>Mazanowska et al, <sup>19</sup> 2022<br>Scharwz et al, <sup>30</sup> 2022<br>Yuksel et al, <sup>31</sup> 2017<br>Stoumpos et al, <sup>32</sup> 2016<br>Blume et al, <sup>33</sup> 2013<br>Bramham et al, <sup>26</sup> 2013<br>Coffin et al, <sup>27</sup> 2010<br>Kim et al, <sup>34</sup> 2008<br>Sibanda et al, <sup>35</sup> 2007<br>Pezeshki et al, <sup>28</sup> 2004 | 2000                      | 51                     | 2.39 (1.20-3.96)                    | 68.5                    | 0.020                |
| Acute graft loss during pregnancy | 6                     | Scharwz et al, <sup>30</sup> 2022<br>Yuksel et al, <sup>31</sup> 2017<br>Stoumpos et al, <sup>32</sup> 2016<br>Bramham et al, <sup>26</sup> 2013<br>Sibanda et al, <sup>35</sup> 2007<br>Pezeshki et al, <sup>28</sup> 2004                                                                                                                                                                                                                                                             | 530                       | 9                      | 1.55 (0.05-4.44)                    | 69.2                    | 0.030                |

**eFigure 6. Pooled acute allograft rejection incidence during pregnancy**

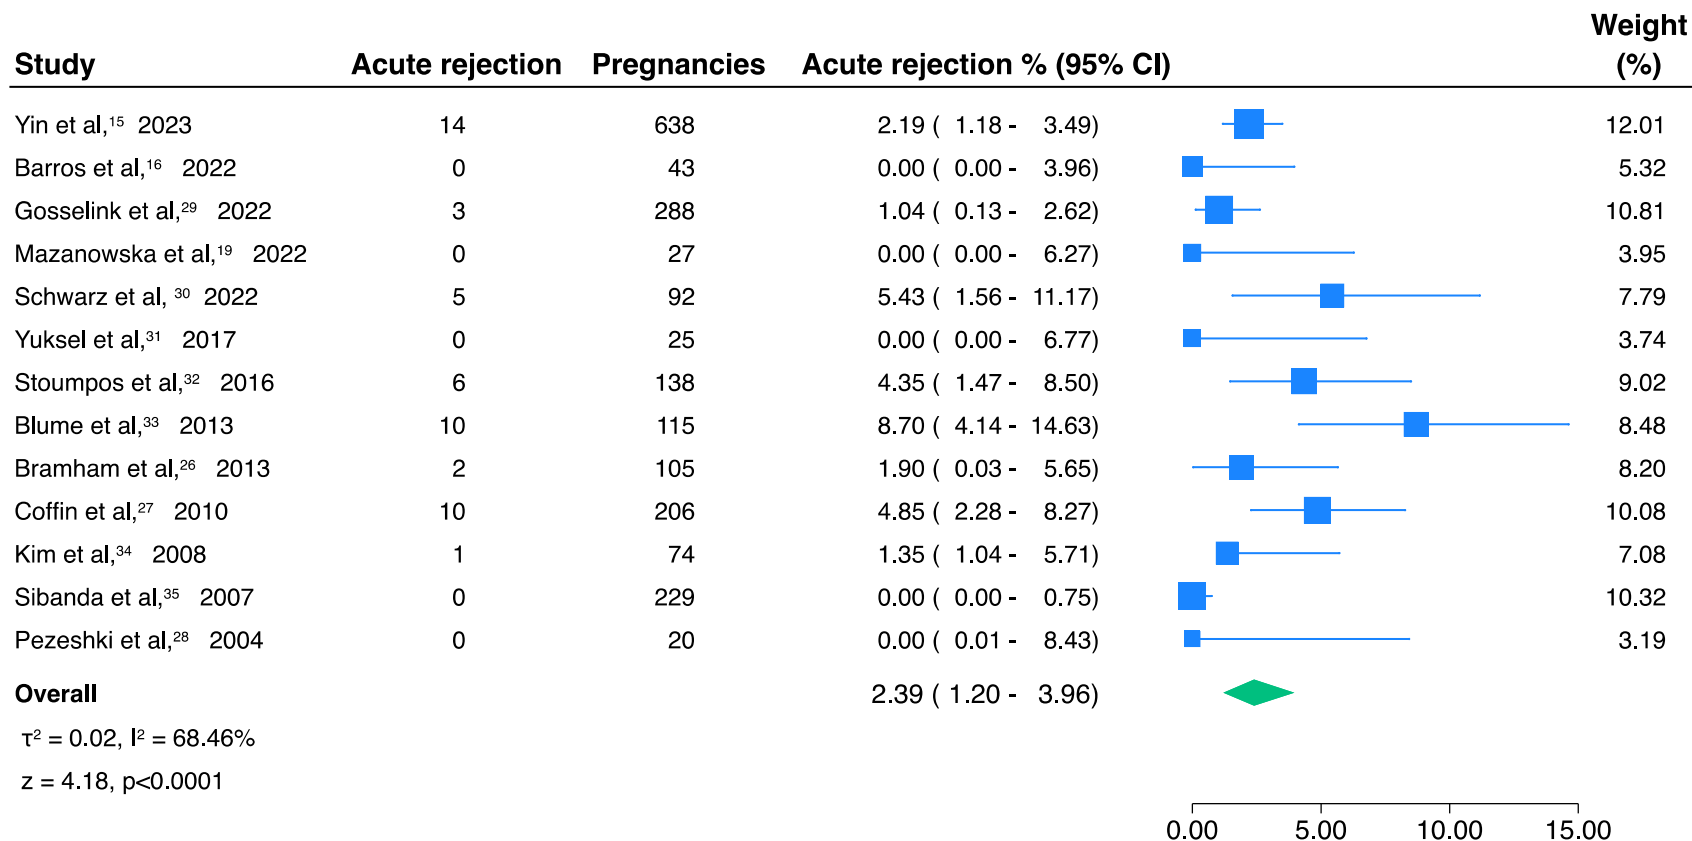

**eFigure 7. Pooled acute allograft loss incidence during pregnancy**

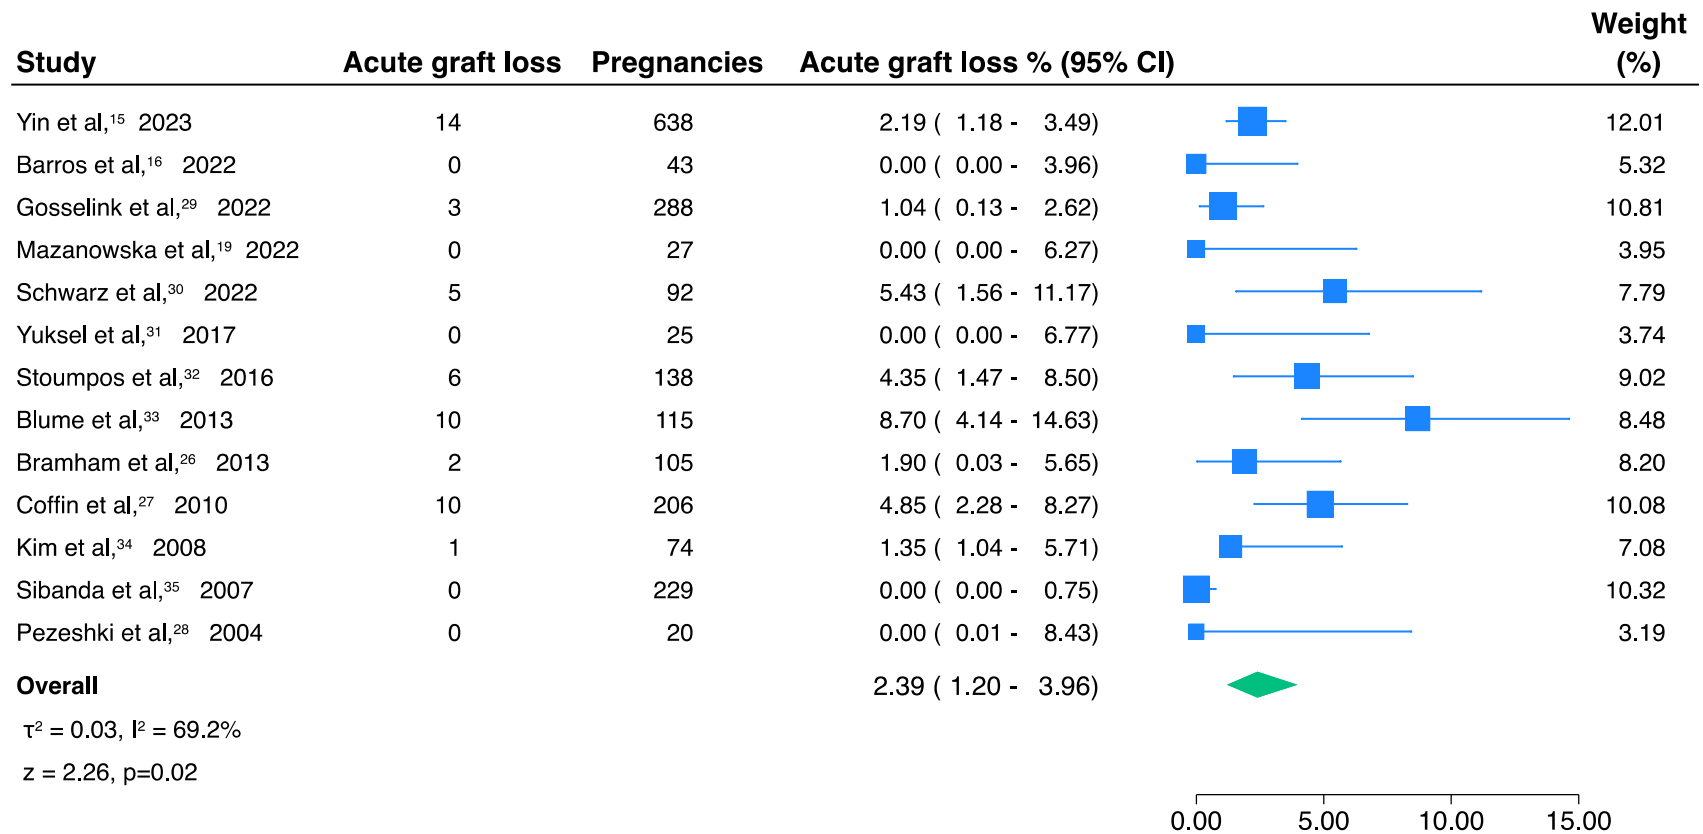

**eFigure 8. Funnel plot for studies reporting acute allograft rejection during pregnancy**

Eggers test p value = 0.009 indicates small study effects

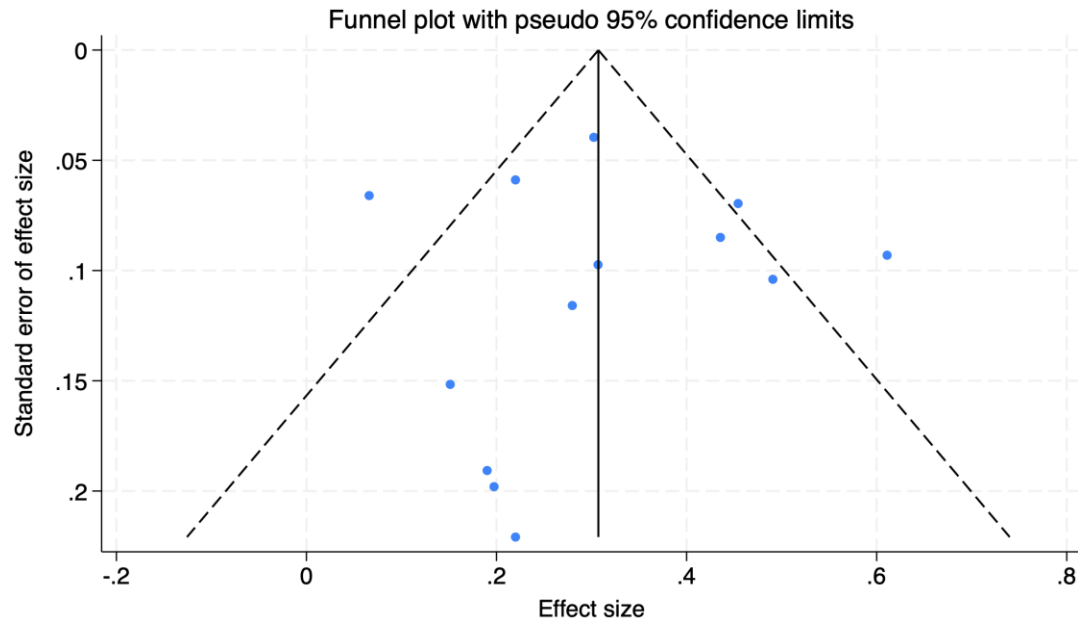

**eTable 4. Risk of bias assessment for studies reporting at least one adverse pregnancy outcome**

| Primary author, Year                 | Type of study | Representativeness of the exposed cohort | Selection of the non-exposed cohort | Ascertainment of exposure | Demonstration that outcome of interest was not present at the start of the study | Comparability | Ascertainment of outcome | Follow up long enough | Adequacy of follow up | Total Score |
|--------------------------------------|---------------|------------------------------------------|-------------------------------------|---------------------------|----------------------------------------------------------------------------------|---------------|--------------------------|-----------------------|-----------------------|-------------|
| Craig et al, <sup>36</sup> 2023      | RC            | ★                                        | ★                                   | ★                         | ★                                                                                | ★★            | ★                        | ★                     | ★                     | 9           |
| Barros et al, <sup>16</sup> 2022     | RC            | ★                                        | ★                                   | ★                         | ★                                                                                |               | ★                        | ★                     | ★                     | 7           |
| DeFilippis et al, <sup>17</sup> 2022 | RC            | ★                                        | ★                                   | ★                         | ★                                                                                | ★★            | ★                        | ★                     | ★                     | 9           |
| Hewawasam et al, <sup>18</sup> 2022  | RC            | ★                                        | ★                                   | ★                         | ★                                                                                | ★★            | ★                        | ★                     | ★                     | 9           |
| Mazanowska et al, <sup>19</sup> 2022 | RC            | ★                                        | ★                                   | ★                         | ★                                                                                | ★             | ★                        | ★                     | ★                     | 8           |
| Sobotka et al, <sup>20</sup> 2021    | RC            | ★                                        | ★                                   | ★                         | ★                                                                                | ★             | ★                        | ★                     | ★                     | 8           |
| Piccoli et al, <sup>21</sup> 2017    | RC            | ★                                        | ★                                   | ★                         | ★                                                                                | ★★            | ★                        | ★                     | ★                     | 9           |
| Madej et al, <sup>22</sup> 2016      | RC            | ★                                        |                                     | ★                         | ★                                                                                |               | ★                        | ★                     |                       | 5           |
| Majak et al, <sup>23</sup> 2016      | RC            | ★                                        | ★                                   | ★                         | ★                                                                                | ★★            | ★                        | ★                     | ★                     | 9           |
| Arab et al, <sup>24</sup> 2015       | RC            | ★                                        | ★                                   | ★                         | ★                                                                                | ★★            | ★                        | ★                     | ★                     | 9           |
| Wyld et al, <sup>25</sup> 2013       | RC            | ★                                        | ★                                   | ★                         | ★                                                                                | ★★            | ★                        | ★                     | ★                     | 9           |
| Bramham et al, <sup>26</sup> 2013    | RC            | ★                                        | ★                                   | ★                         | ★                                                                                | ★             | ★                        | ★                     | ★                     | 8           |
| Coffin et al, <sup>27</sup> 2010     | RC            | ★                                        | ★                                   | ★                         | ★                                                                                | ★             | ★                        | ★                     | ★                     | 8           |
| Pezeshki et al, <sup>28</sup> 2004   | RC            | ★                                        |                                     | ★                         | ★                                                                                | ★             | ★                        | ★                     | ★                     | 7           |

Based on Newcastle Ottawa Scale (NOS), the studies were classified as high (8–9 stars), moderate (6–7 stars), and low quality (<6 stars); RC, retrospective cohort study;



**eTable 5. Risk of Bias assessment for allograft outcomes**

| Primary author, Year                 | Type of study | Representativeness of the exposed cohort | Selection of the non-exposed cohort | Ascertainment of exposure | Demonstration that outcome of interest was not present at the start of the study | Ascertainment of outcome | Follow up long enough | Adequacy of follow up | Total Score |
|--------------------------------------|---------------|------------------------------------------|-------------------------------------|---------------------------|----------------------------------------------------------------------------------|--------------------------|-----------------------|-----------------------|-------------|
| Yin et al, <sup>15</sup> 2023        | RC            | ★                                        | ★                                   | ★                         | ★                                                                                | ★                        | ★                     | ★                     | 7           |
| Barros et al, <sup>16</sup> 2022     | RC            | ★                                        | ★                                   | ★                         | ★                                                                                | ★                        | ★                     | ★                     | 7           |
| Gosselink et al, <sup>29</sup> 2022  | RC            | ★                                        | ★                                   | ★                         | ★                                                                                | ★                        | ★                     | ★                     | 7           |
| Mazanowska et al, <sup>19</sup> 2022 | RC            | ★                                        | ★                                   | ★                         | ★                                                                                | ★                        | ★                     | ★                     | 7           |
| Scharwz et al, <sup>30</sup> 2022    | RC            | ★                                        | ★                                   | ★                         | ★                                                                                | ★                        | ★                     | ★                     | 7           |
| Yuksel et al, <sup>31</sup> 2017     | RC            | ★                                        | ★                                   | ★                         | ★                                                                                | ★                        | ★                     | ★                     | 7           |
| Stoumpos et al, <sup>32</sup> 2016   | RC            | ★                                        | ★                                   | ★                         | ★                                                                                | ★                        | ★                     | ★                     | 7           |
| Blume et al, <sup>33</sup> 2013      | RC            | ★                                        | ★                                   | ★                         | ★                                                                                | ★                        | ★                     | ★                     | 7           |
| Bramham et al, <sup>26</sup> 2013    | RC            | ★                                        | ★                                   | ★                         | ★                                                                                | ★                        | ★                     | ★                     | 7           |
| Coffin et al, <sup>27</sup> 2010     | RC            | ★                                        | ★                                   | ★                         | ★                                                                                | ★                        | ★                     | ★                     | 7           |
| Kim et al, <sup>34</sup> 2008        | RC            | ★                                        | ★                                   | ★                         | ★                                                                                |                          | ★                     | ★                     | 6           |
| Sibanda et al, <sup>35</sup> 2007    | CC            | ★                                        | ★                                   | ★                         | ★                                                                                | ★                        | ★                     | ★                     | 7           |
| Pezeshki et al, <sup>28</sup> 2004   | RC            | ★                                        |                                     | ★                         | ★                                                                                | ★                        | ★                     | ★                     | 6           |

RC, Retrospective cohort study; CC, Case control study

The individual components of the selection (3) and outcome (3) criteria listed above are summed to generate a total modified Newcastle-Ottawa Scale (NOS) risk of bias score for each study. Total scores range from 0 to 6. Studies were judged to be of low risk of bias ( $\geq 4$  stars) and high risk of bias ( $< 4$  stars)
