# Supplementary material for: Adverse Pregnancy Outcomes in Solid Organ Transplant Recipients: A Systematic Review and Meta-Analysis
Source: PubMed Central journal article supplement (PMC11362861; doi:10.1001/jamanetworkopen.2024.30913), 2024-08-29
Supplement: jamanetwopen-e2430913-s002.pdf [file jamanetwopen-e2430913-s002.pdf]

## Data Sharing Statement

Yo. Adverse Pregnancy Outcomes in Solid Organ Transplant Recipients. *JAMA Netw Open*.  
Published August 29, 2024. doi:10.1001/jamanetworkopen.2024.30913

### Data

**Data available:** Yes

**Data types:** Other (please specify)

**Additional Information:** Statistical code

**How to access data:** Statistical code will be available upon request

**When available:** With publication

### Supporting Documents

**Document types:** Other (please specify)

**Additional Information:** statistical code

**How to access documents:** upon request of first author - Jennifer Yo

**When available:** With publication

### Additional Information

**Who can access the data:** List of excluded studies from systematic review

**Types of analyses:** for purposes of research

**Mechanisms of data availability:** with investigator support
